# Supplementary material for: Facile assembly for fast construction of intercalation hybrids of layered double hydroxides with anionic metalloporphyrin
Source: Royal Society of Chemistry journal article supplement (doi:10.1039/c4dt00967c), 2014-01-01
Supplement: c4dt00967c1.pdf [file c4dt00967c1.pdf]

Electronic Supplementary Material (ESI) for Dalton Transactions

## Facile assembly for fast construction of intercalation hybrids of layered double hydroxides with anionic metalloporphyrin

Juanjuan Ma,<sup>a</sup> Lin Liu,<sup>a</sup> Shanzhong Li,<sup>a</sup> Meng Zhuo,<sup>a</sup> Feng Shao,<sup>a,b</sup> Junyan Gong<sup>a</sup> and Zhiwei Tong<sup>\*ac</sup>

<sup>a</sup> Department of Chemical Engineering, Huaihai Institute of Technology, Lianyungang 222005, P.R. China

<sup>b</sup> School of Chemical Engineering, China University of Mining and Technology, Xuzhou, 221116, P.R. China

<sup>c</sup> SORST, Japan Science and Technology (JST)

### Chemical composition of LDHs and MnTSPP/LDH nanocomposites:

(1) Mg-Al-CO<sub>3</sub> LDH

Chemical analysis (C, H, N): C, 2.58; H, 4.11. Metal analysis indicated Mg/Al molar ratios of 1.94. The water content measured by TGA was equal to 1.9 H<sub>2</sub>O molecules per Al<sup>3+</sup> cation.

(2) Ni-Al-CO<sub>3</sub> LDH

Chemical analysis (C, H, N): C, 1.84; H, 3.06. Metal analysis indicated Ni/Al molar ratios of 2.13. The water content measured by TGA was equal to 1.8 H<sub>2</sub>O molecules per Al<sup>3+</sup> cation.

(3) MnTSPP/Mg-Al LDH<sub>2.0</sub>

The following data were found from chemical analysis (C, H, N): C 22.05, H 4.47, N 3.28. Metal analysis indicated Mg/Al and Mn/Al molar ratios of 1.17 and 0.13, respectively. The water content measured by TGA was equal to 3.1 H<sub>2</sub>O molecules per Al<sup>3+</sup> cation. The intercalated material contains 389 μmol of MnTSPP per gram of material.

(4) MnTSPP/Ni-Al LDH<sub>1.0</sub>

The following data were found from chemical analysis (C, H, N): C 19.68, H 3.79, N 2.56. Metal analysis indicated Ni/Al and Mn/Al molar ratios of 1.21 and 0.13, respectively. The water content measured by TGA was equal to 2.4 H<sub>2</sub>O molecules per Al<sup>3+</sup> cation. The intercalated material contains 360 μmol of MnTSPP per gram of material.

Table S1 Properties of the pristine LDH samples

| Properties                                           | Mg-Al-CO <sub>3</sub> LDH                                                                                          | Ni-Al-CO <sub>3</sub> LDH                                                                                          |
|------------------------------------------------------|--------------------------------------------------------------------------------------------------------------------|--------------------------------------------------------------------------------------------------------------------|
| Chemical formula                                     | [Mg <sub>0.66</sub> Al <sub>0.34</sub> (OH) <sub>2</sub> ](CO <sub>3</sub> ) <sub>0.17</sub> ·0.63H <sub>2</sub> O | [Ni <sub>0.68</sub> Al <sub>0.32</sub> (OH) <sub>2</sub> ](CO <sub>3</sub> ) <sub>0.16</sub> ·0.57H <sub>2</sub> O |
| <i>d</i> <sub>110</sub> , Å                          | 1.524                                                                                                              | 1.517                                                                                                              |
| Unit cell <i>a</i> , <sup>a</sup> Å                  | 3.048                                                                                                              | 3.034                                                                                                              |
| Layer unit area, <sup>b</sup> Å <sup>2</sup>         | 8.046                                                                                                              | 7.972                                                                                                              |
| Layer charge density, e <sup>-</sup> /Å <sup>2</sup> | 0.0423                                                                                                             | 0.0401                                                                                                             |
| Equivalent area, Å <sup>2</sup> /charge              | 23.6                                                                                                               | 24.9                                                                                                               |

<sup>a</sup>  $a = 2d_{110}$ .

<sup>b</sup> Area of a M<sup>II</sup><sub>1-x</sub>Al<sub>x</sub>(OH)<sub>2</sub> octahedral unit =  $a^2 \sin 60^\circ$ .

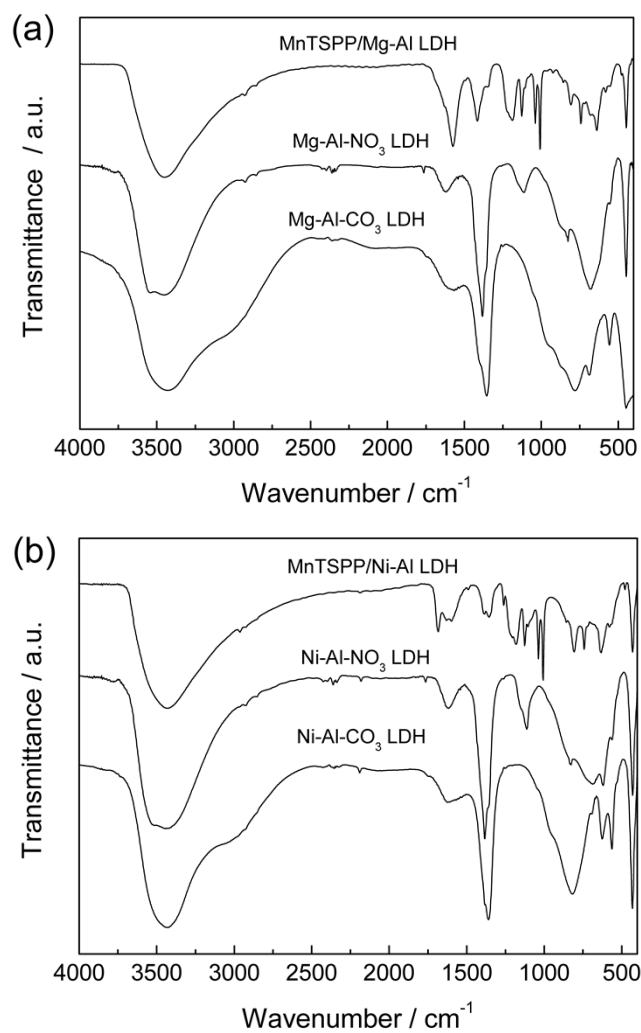

**Fig. S1** FT-IR spectra of carbonated, nitrated and metalloporphyrin intercalated LDH samples: (a) Mg-Al LDHs, (b) Ni-Al LDHs

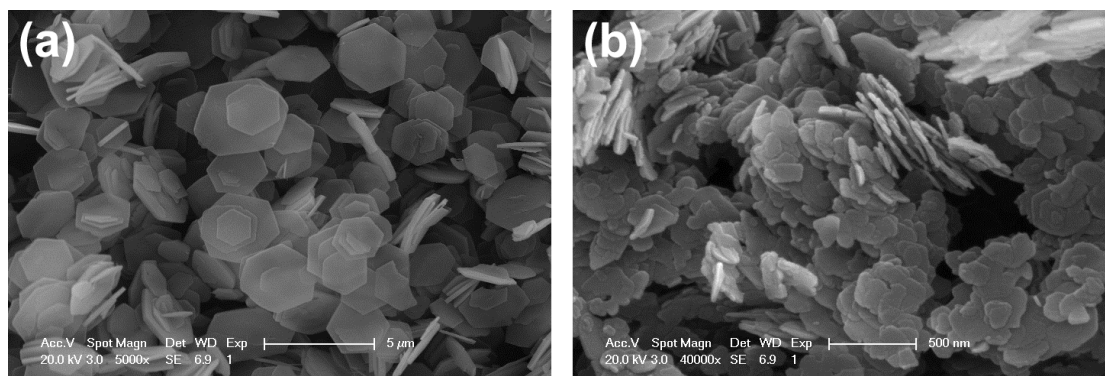

**Fig. S2** SEM images of (a) Mg-Al-CO<sub>3</sub> LDHs and (b) Ni-Al-CO<sub>3</sub> LDHs.

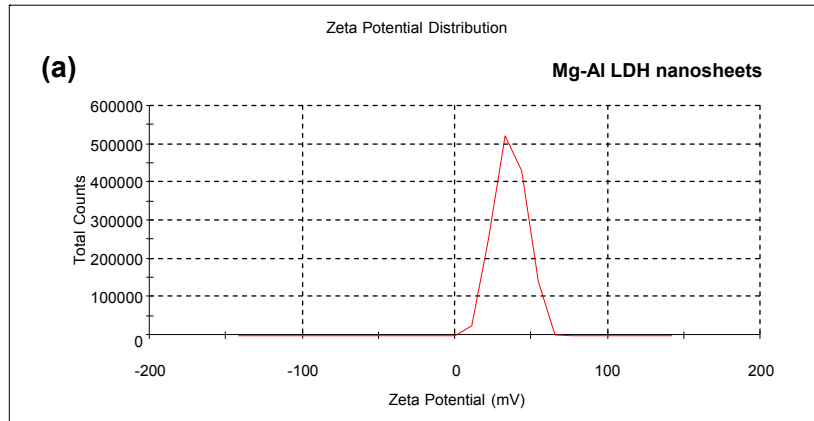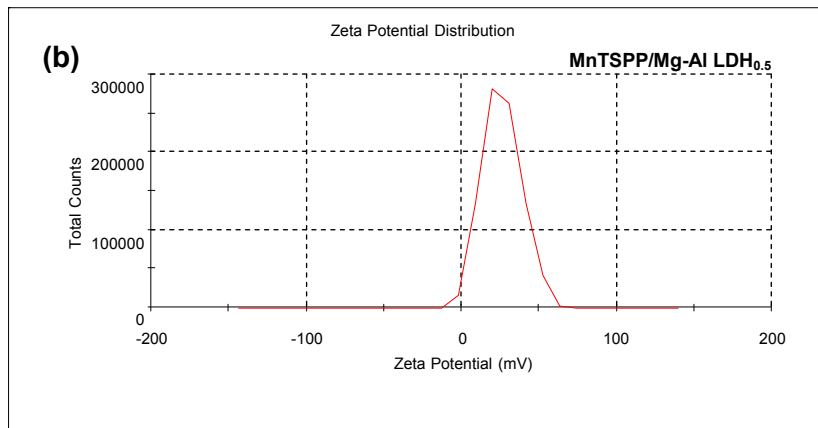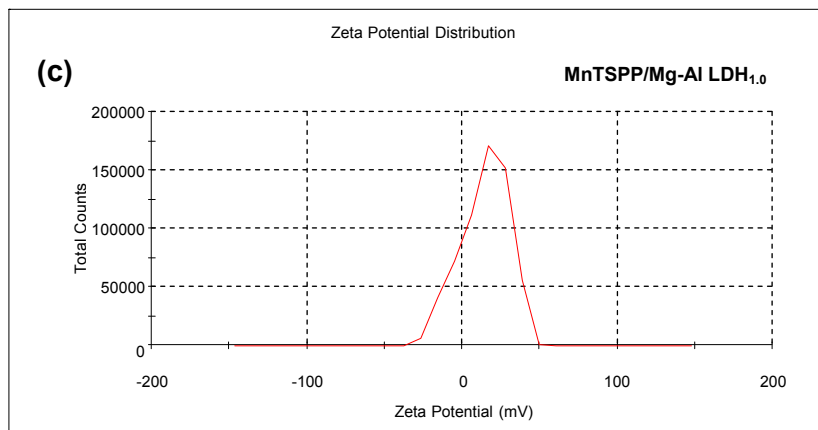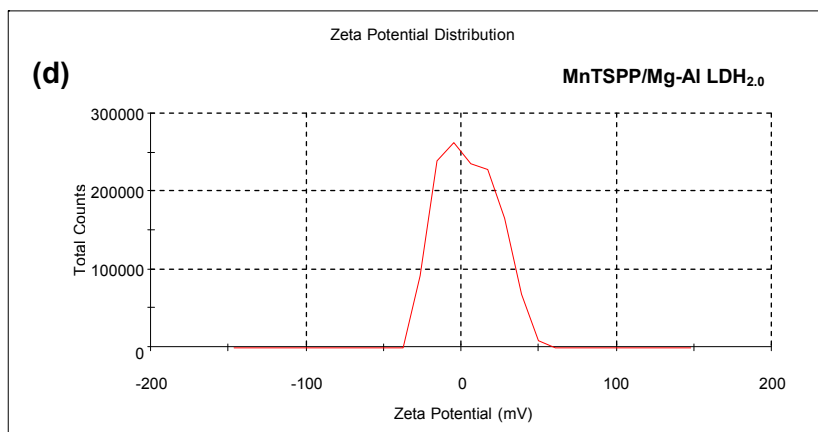

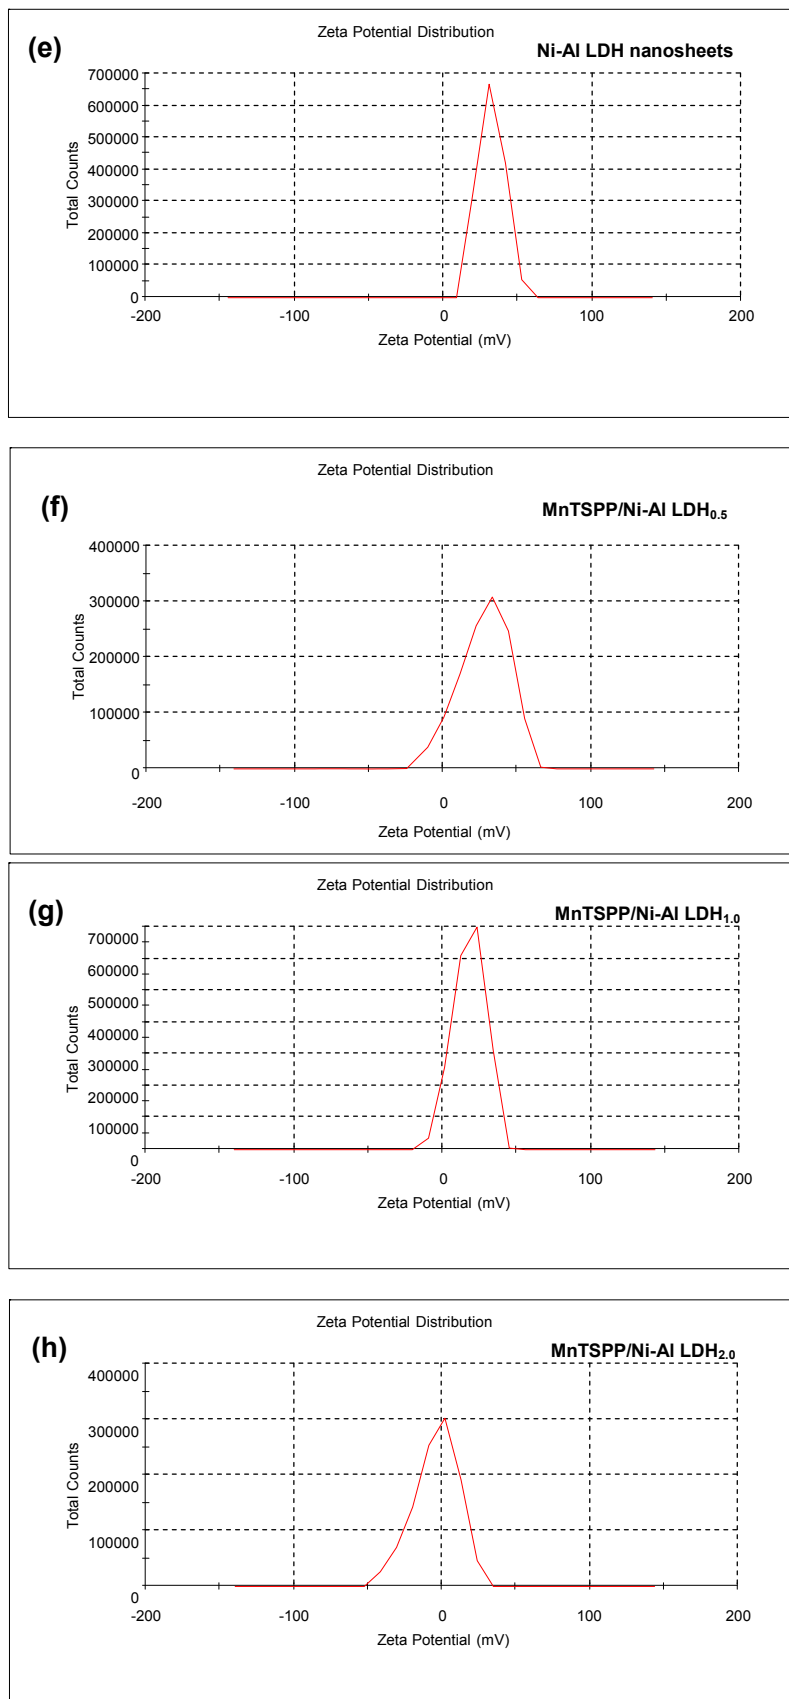

**Fig. S3** Zeta potential changes with the addition of different volumes of MnTSPP aqueous solution into Mg-Al LDH (a~d) and Ni-Al LDH (e~h) nanosheets in formamide.
